# Supplementary figures and images for: Co-interventions withClostridium butyricumand soluble dietary fiber targeting the gut microbiota improve MAFLDviathe Acly/Nrf2/NF-κB signaling pathway
Source: Royal Society of Chemistry journal article supplement (doi:10.1039/d1fo04224f), 2022-01-01

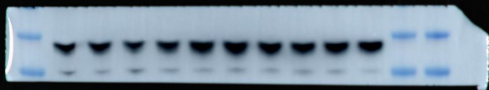

Supplement: d1fo04224f2.pdf [file d1fo04224f2.pdf]
